# Supplementary material for: Prenatal Exposure to Ambient PM2.5 and Early Childhood Growth Impairment Risk in East Africa
Source: MDPI journal article supplement (doi:10.3390/toxics10110705), 2022-11-18
Supplement: s1 [file s1]

# Prenatal Exposure to Ambient PM<sub>2.5</sub> and Early Childhood Growth Impairment Risk in East Africa

Kayan Clarke \*, Adriana Rivas, Salvatore Milletich, Tara Sabo-Attwood and Eric S. Coker

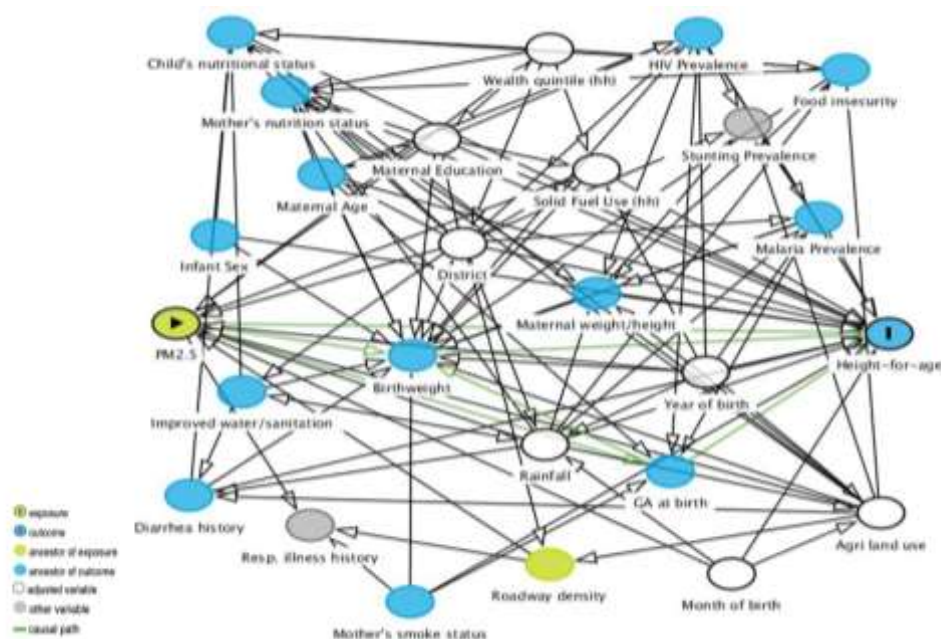

**Figure S1.** Directed Acyclic Graph showing the covariates that were selected as confounders because of their relationship with both the exposure (PM<sub>2.5</sub>) and the outcome (height-for-age).

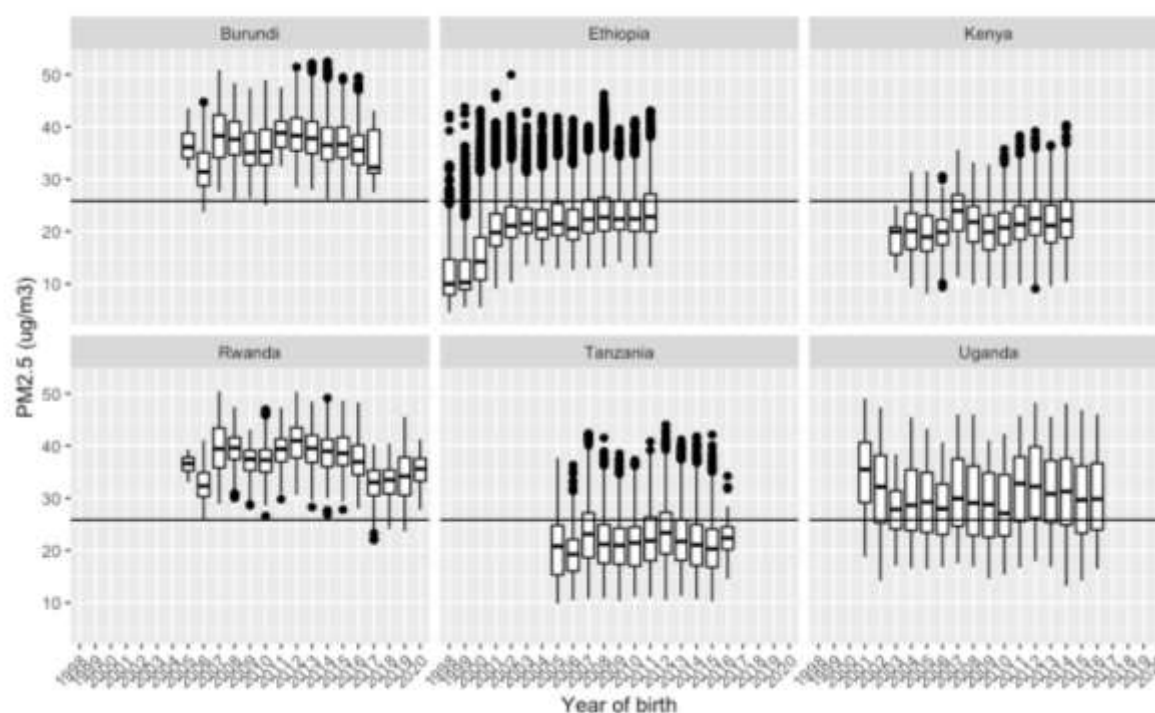

**Figure S2.** Long-term trend of prenatal PM<sub>2.5</sub> exposures stratified by child's year of birth and by country. The horizontal black line shows the overall PM<sub>2.5</sub> population average, (25.83  $\mu\text{g}/\text{m}^3$ ), five times above the WHO annual recommended level at 5  $\mu\text{g}/\text{m}^3$ .

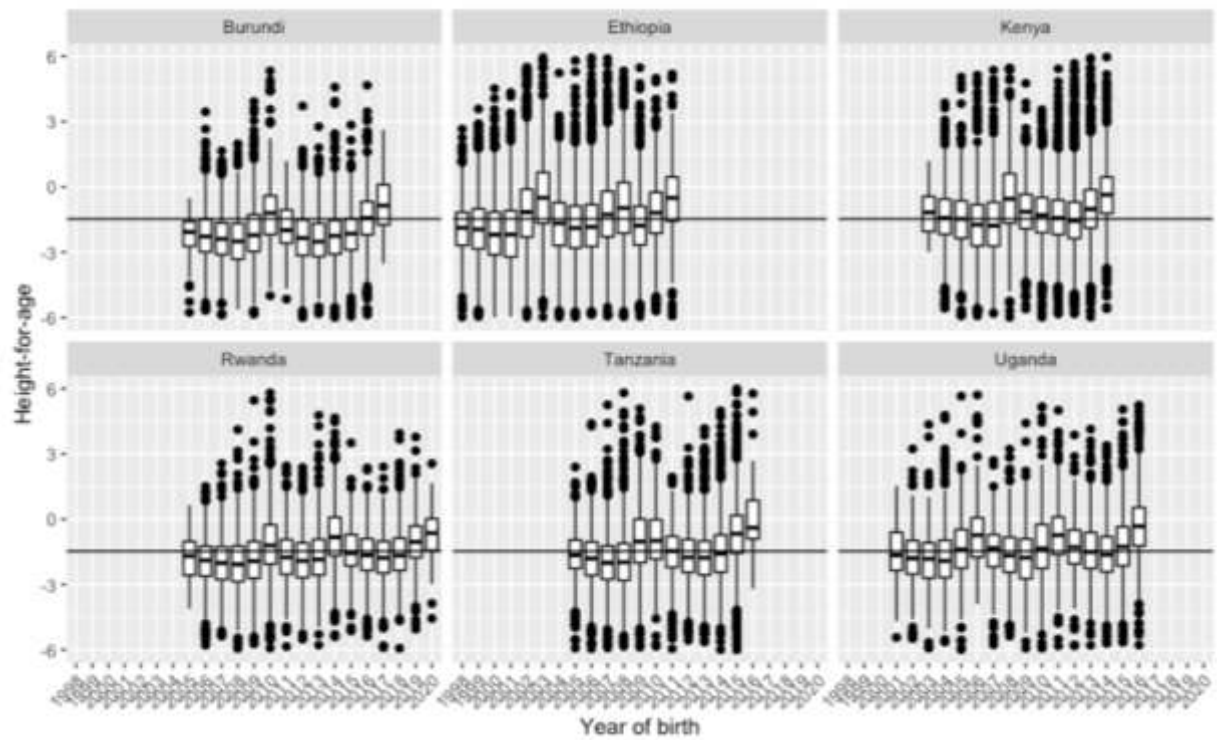

**Figure S3.** Long-term trend of height-for-age stratified by child's year of birth and by country. The horizontal black line shows the overall height standard deviation population average, -1.47 (95% CI: -1.48, -1.46).

Table S1. Crude and adjusted odds ratios for quartiles of prenatal PM2.5 exposure and stunting in children under 5 years old.

|                                   | Crude OR<br>(95% CI)          | aOR <sup>a</sup><br>(95% CI)  | aOR <sup>b</sup><br>(95% CI)  | aOR <sup>c</sup><br>(95% CI)  |
|-----------------------------------|-------------------------------|-------------------------------|-------------------------------|-------------------------------|
| Prenatal PM2.5 exposure quartiles |                               |                               |                               |                               |
| 4.44–19.4 µg/m <sup>3</sup>       | reference                     |                               |                               |                               |
| 19.4–24 µg/m <sup>3</sup>         | 0.8785***<br>(0.8444, 0.9141) | 1.0077<br>(0.965, 1.0525)     | 1.0089<br>(0.963, 1.0575)     | 0.990<br>(0.9422, 1.0411)     |
| 24–32.7 µg/m <sup>3</sup>         | 0.981<br>(0.9432, 1.0204)     | 1.0419* (0.995, 1.0911)       | 1.0651**<br>(1.0141, 1.1188)  | 1.0217<br>(0.960, 1.0873)     |
| 32.7–52.4 µg/m <sup>3</sup>       | 1.4383***<br>(1.3839, 1.4947) | 1.3185***<br>(1.2380, 1.4043) | 1.3408***<br>(1.2565, 1.4307) | 1.2560***<br>(1.1502, 1.3716) |
| Type of residence                 |                               |                               |                               |                               |
| Urban                             |                               | reference                     |                               |                               |
| Rural                             |                               | 1.1095***<br>(1.0578, 1.1636) | 1.1083***<br>(1.0522, 1.1673) | 1.1144***<br>(1.0575, 1.1744) |
| Maternal education                |                               |                               |                               |                               |
| 1 <sup>st</sup> quartile          |                               | reference                     |                               |                               |
| 2 <sup>nd</sup> quartile          |                               | 0.959**<br>(0.9256, 0.994)    | 0.9357***<br>(0.9015, 0.971)  | 0.9367***<br>(0.9022, 0.973)  |
| 3 <sup>rd</sup> quartile          |                               | 0.6825***<br>(0.6444, 0.7229) | 0.6632***<br>(0.6238, 0.7052) | 0.6624***<br>(0.6226, 0.7048) |
| 4 <sup>th</sup> quartile          |                               | 0.4690***<br>(0.4148, 0.5303) | 0.4518***<br>(0.3946, 0.5173) | 0.4399***<br>(0.3834, 0.504)  |
| Wealth index                      |                               |                               |                               |                               |
| 1 <sup>st</sup> quintile          |                               | reference                     |                               |                               |
| 2 <sup>nd</sup> quintile          |                               | 0.9171***<br>(0.8800, 0.956)  | 0.9239***<br>(0.8845, 0.965)  | 0.9134***<br>(0.8740, 0.955)  |
| 3 <sup>rd</sup> quintile          |                               | 0.8059***<br>(0.7715, 0.8418) | 0.8222***<br>(0.7855, 0.8607) | 0.8147***<br>(0.7779, 0.8532) |
| 4 <sup>th</sup> quintile          |                               | 0.6580***<br>(0.6281, 0.6894) | 0.6702***<br>(0.6385, 0.7035) | 0.6617***<br>(0.6300, 0.6950) |
| 5 <sup>th</sup> quintile          |                               | 0.4334***<br>(0.4073, 0.4611) | 0.4383***<br>(0.4107, 0.4676) | 0.4324***<br>(0.4050, 0.4616) |
| Use of polluting fuel             |                               |                               |                               |                               |
| No                                |                               | reference                     |                               |                               |
| Yes                               |                               | 1.1832**<br>(1.0245, 1.3665)  | 1.1452*<br>(0.980, 1.3383)    | 1.1534*<br>(0.986, 1.3499)    |
| Breastfed                         |                               |                               |                               |                               |
| No                                |                               |                               | reference                     |                               |
| Yes                               |                               |                               | 0.8500***<br>(0.7546, 0.958)  | 0.8494***<br>(0.7533, 0.958)  |
| Postnatal PM2.5 exposure          |                               |                               |                               | 1.0061***<br>(1.0018, 1.0104) |

Logistic regression where the covariates are the estimated odds ratio of the outcome. \*\*\*p < 0.01, \*\*p < 0.05, \*p < 0.1

<sup>a</sup>Model 1: Smoothing terms for year of birth, percent crop and random effects for primary sampling unit, mother, month of birth, and country. <sup>b</sup>Model 2: Ever breastfed added to the model. <sup>c</sup>Model 3: Postnatal PM2.5 exposure added to the model. CI: Confidence Interval; OR: Odds Ratio; aOR: adjusted Odds Ratio

Table S1

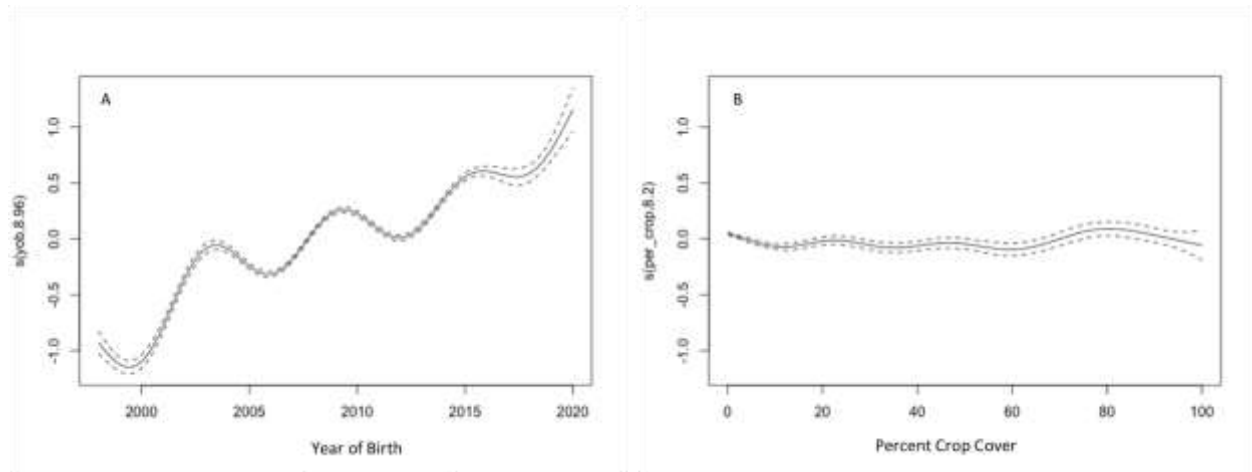

**Figure S4.** Plots of non-linear effects on height-for-age for (A) year of birth and (B) percent crop cover.

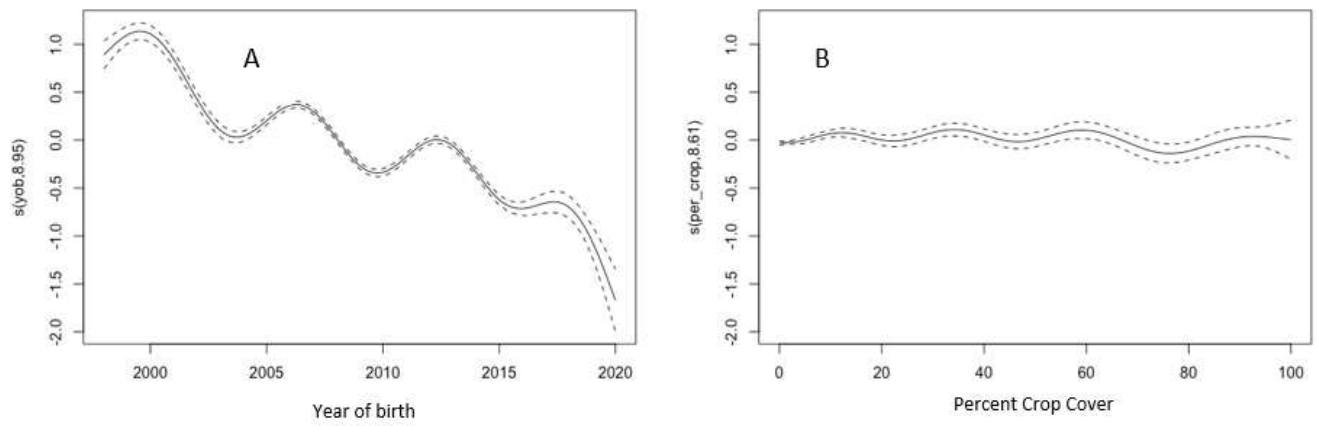

**Figure S5.** Plots of non-linear effects on stunting for (A) year of birth and (B) percent crop cover.
